# Supplementary material
Source: PubMed Central journal article supplement (PMC5580889)

## SUPPLEMENTAL INFORMATION

### **Sensitive and selective quantification of free and total malondialdehyde in plasma using UHPLC-HRMS**

Rute Mendonça<sup>1,2</sup>, Ophélie Gning<sup>1</sup>, Claudia Di Cesare<sup>3</sup>, Laurence Lachat<sup>3</sup>, Nigel C. Bennett<sup>2</sup>, Fabrice Helfenstein<sup>1, a</sup> and Gaétan Glauser<sup>3, a</sup>

<sup>1</sup>Laboratory of Evolutionary Ecophysiology, Institute of Biology, University of Neuchâtel, Rue Emile-Argand 11, 2000 Neuchâtel, Switzerland

<sup>2</sup>Department of Zoology and Entomology, University of Pretoria, Pretoria 0002, South Africa

<sup>3</sup>Neuchâtel Platform of Analytical Chemistry, University of Neuchâtel, Avenue de Bellevaux 51, 2000 Neuchâtel, Switzerland

<sup>a</sup>These authors share senior authorship

#### **Corresponding author:**

Gaétan Glauser

Neuchâtel Platform of Analytical Chemistry, University of Neuchâtel, Avenue de Bellevaux 51, 2000 Neuchâtel, Switzerland

Phone: +41 32 718 25 34

Email: [gaetan.glauser@unine.ch](mailto:gaetan.glauser@unine.ch)

**Running title:** Quantification of free and total plasma MDA using UHPLC-HRMS

**Supplemental Table S1 – Linearity assay using different concentrations of purified MDA-DNPH.** Calibration equation was:  $y=11.50x + 1.89$ , weighing  $1/x$ , with  $r^2=0.997$ .

| MDA-DNPH standards                | Trace (m/z) | Predicted RT (min) | RT (min) | Back calculated concentration (ng mL <sup>-1</sup> ) | Standard concentration (ng mL <sup>-1</sup> ) | Accuracy (%) | Injection volume (μL) |
|-----------------------------------|-------------|--------------------|----------|------------------------------------------------------|-----------------------------------------------|--------------|-----------------------|
| Standard 1 ng mL <sup>-1</sup>    | 235.0462    | 2.87               | 2.88     | 1.07                                                 | 1                                             | 106.8        | 2.5                   |
| Standard 2.5 ng mL <sup>-1</sup>  | 235.0462    | 2.87               | 2.88     | 2.55                                                 | 2.5                                           | 102.1        | 2.5                   |
| Standard 5 ng mL <sup>-1</sup>    | 235.0462    | 2.87               | 2.87     | 4.66                                                 | 5                                             | 93.3         | 2.5                   |
| Standard 10 ng mL <sup>-1</sup>   | 235.0462    | 2.87               | 2.87     | 10.23                                                | 10                                            | 102.3        | 2.5                   |
| Standard 50 ng mL <sup>-1</sup>   | 235.0462    | 2.87               | 2.88     | 47.91                                                | 50                                            | 95.8         | 2.5                   |
| Standard 200 ng mL <sup>-1</sup>  | 235.0462    | 2.87               | 2.87     | 211.86                                               | 200                                           | 105.9        | 2.5                   |
| Standard 500 ng mL <sup>-1</sup>  | 235.0462    | 2.87               | 2.87     | 508.71                                               | 500                                           | 101.7        | 2.5                   |
| Standard 1000 ng mL <sup>-1</sup> | 235.0462    | 2.87               | 2.87     | 1134.25                                              | 1000                                          | 113.4        | 2.5                   |
| Standard 2000 ng mL <sup>-1</sup> | 235.0462    | 2.87               | 2.88     | 1938.33                                              | 2000                                          | 96.9         | 2.5                   |
| Standard 5000 ng mL <sup>-1</sup> | 235.0462    | 2.87               | 2.87     | 4908.94                                              | 5000                                          | 98.2         | 2.5                   |

**Supplemental Table S2 – Calibration assay using different concentrations of MDA salt with constant concentration (3000 nM) of D<sub>2</sub>-MDA.**

Calibration equation was:  $y=0.0253x + 0.0085$ , weighing:  $1/x$ , with  $r^2=0.999$ .

| MDA standards    | Trace<br>(m/z) | Predicted<br>RT (min) | RT (min) | Back calculated<br>concentration (nM) | Accuracy<br>(%) | Injection<br>volume (μL) |
|------------------|----------------|-----------------------|----------|---------------------------------------|-----------------|--------------------------|
| Standard 32 nM   | 235.0462       | 2.87                  | 2.86     | 30.8                                  | 96.3            | 2.5                      |
| Standard 80 nM   | 235.0462       | 2.87                  | 2.86     | 82.4                                  | 103.0           | 2.5                      |
| Standard 321 nM  | 235.0462       | 2.87                  | 2.86     | 334.9                                 | 104.3           | 2.5                      |
| Standard 803 nM  | 235.0462       | 2.87                  | 2.86     | 757.2                                 | 94.3            | 2.5                      |
| Standard 1606 nM | 235.0462       | 2.87                  | 2.86     | 1641.0                                | 102.2           | 2.5                      |
| Standard 6427 nM | 235.0462       | 2.87                  | 2.86     | 6422.7                                | 99.9            | 2.5                      |

**Supplemental Figure S3 – Calibration curve obtained for the linearity assay using different concentrations of purified MDA-DNPH.** Calibration equation was:  $y=11.50x + 1.89$ , weighing  $1/x$ , with  $r^2=0.997$ .

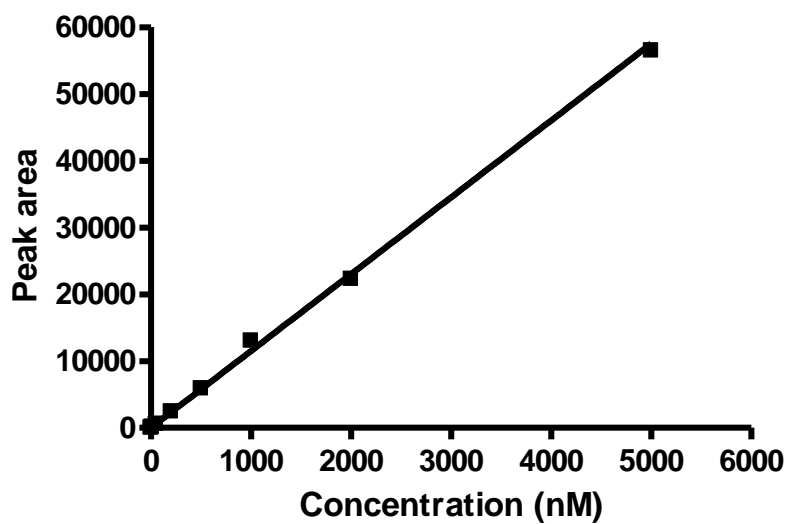

**Supplemental Figure S4 – Calibration curve obtained using different concentrations of MDA**

**salt.** Calibration equation was:  $y=0.0253x + 0.0085$ , weighing:  $1/x$ , with  $r^2=0.999$ .

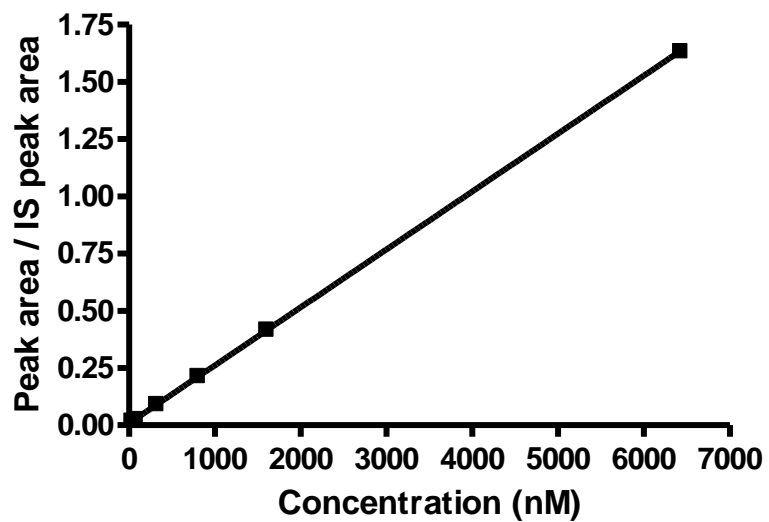

Supplement: 10.1194_D076661_jlr.D076661-1.pdf [file 10.1194_D076661_jlr.D076661-1.pdf]
